# Supplementary material for: Cryo-EM structures of ryanodine receptors and diamide insecticides reveal the mechanisms of selectivity and resistance
Source: Springer Nature journal article supplement (doi:10.1038/s41467-024-53490-0), 2024-10-20

|       |                 |                 |                |                |                |               |                 |              |                  |                 |      |
|-------|-----------------|-----------------|----------------|----------------|----------------|---------------|-----------------|--------------|------------------|-----------------|------|
| rRyR1 | MGD - - GGE     | - DEVQFLRTD     | DEVVLQCSAT     | VLKEQLKCL      | AAEGFGNRLC     | FLEPTSAQN     | VPPDLAICCF      | TLEQSLSVRA   | LQEML - ANT      | EAGVES - - S    | 93   |
| sRyR1 | MAEAEGGASE      | QDDVSLRTE       | DMVCLSCAT      | - - - - GERVCL | AAEGFGNRRHC    | FLENIAD - KN  | IPPDLSQCVF      | VIEQALSVRA   | LQELVTAAGS       | ETGKENLGKG      | 95   |
| rRyR1 | OGGHRHTLLY      | GHAILLRHAH      | SRMYLSCLTT     | SRSMTDKLAF     | DVYGLQEDATG    | EACWWTMHPA    | SKQRSEGEKV      | RVGDDLLVLS   | VSSERYLHLS       | TASGELQ - VD    | 192  |
| sRyR1 | TGSGHRHTLLY     | GNAILLRHLN      | SDMYLACLST     | SSSQ - DKLAF   | DVYGLQEHSGQ    | EACWWTLHPA    | SKQRSEGEKV      | RVGDDLLVLS   | VATERYLH - T     | TKENEVSIVN      | 193  |
| rRyR1 | ASFMQTLWNM      | NP - - - - ICSC | CEEGYVTGGH     | VLRFLFHGMD     | ECLTI - SAAD   | SDQRRRLVY     | EGGAVCTHAR      | SLWRLEPLRI   | SWSGSHLRWG       | QPLRIRHVTT      | 287  |
| sRyR1 | ASFHVTHWSV      | QPYGTGISRM      | KYGVYVFGGD     | VLRFFHGG - D   | ECLTIPTSTWT    | KDGGQNIIVY    | EGGSVMSQAR      | SLWRLELART   | KWAGGFINWY       | HPMRIRHITT      | 292  |
| rRyR1 | GRYLALEDQ       | GLVVVDACKA      | HTKATSF CFR    | VSKE - KLDTA   | PKRDVEGMCP     | PEIKYGESLC    | FVQHVASGLW      | LTAAAPDPKA   | LRLG - VLKKK     | ATLHQEGHMD      | 385  |
| sRyR1 | GRYLVNDQN       | ELYLVSREEA      | TTASCACFLR     | QEKDDQKQVL     | EDKDLEVIGA     | PIIKYGDSTV    | IVQHSETGLW      | LSYKSYETKK   | KGVGKVEEQ        | AILHEEGKMD      | 392  |
| rRyR1 | DALFLTRCQ       | EESQAARMIH      | STAGLYNQFI     | KGLDSFSGKP     | RGSGPPAGPA     | LPTEAVILSL    | QDLIGYFEPF      | SEELQHEEKQ   | SKLRSLRNRQ       | SLFOEEGMLS      | 485  |
| sRyR1 | DGLDFRSRQE      | EESRTARVIR      | KCSLSLTFKI     | NGLETQENR      | RHSMFFA - - S  | VNLGEMVMCL    | EDLINYFAQP      | DEDMHEEKQ    | NKFRALNRNQ       | DLFQEEGLIN      | 490  |
| rRyR1 | LVLNCIDRLN      | VYTTAAHFAE      | Y - AGEAAAE    | WKEIVNLLYE     | LLASLIRGNR     | ANCALF - - ST | NLDWVYSKLD      | RLEAS - - SG | ILEVLVCLVI       | ESPEVLNTIQ      | 579  |
| sRyR1 | LILEADIKIN      | VITSQGLFAG      | FLAGDESGQS     | WEMISGYLYQ     | LLAAIIKGNH     | TNCAQFANSN    | RLNWLFSRLG      | S - QASGEGTG | MLDVLHCVLI       | DSPEALNMMR      | 589  |
| rRyR1 | ENHIKSIISL      | LDKHGRNHKV      | LDVLSCLVCV     | NGVAVRNQD      | LITENLLPQR     | ELLQTINLIN    | VYTSIRPNIF      | VGRAEGSTQY   | GKWYFEVMDV       | EVPFPLTAQA      | 679  |
| sRyR1 | DEHIKVIISL      | LEKHGRDPKV      | LDVLSCLCVG     | NGVAVRSSQN     | NICDYLLPGK     | NLLQTLALVD    | HVSSVRPNIF      | VGRVEGSAYV   | RKWYFEVTMD       | HIIEK - TTHMM   | 688  |
| rRyR1 | THLRVGWALT      | EGSYPPYGGG      | EGWGGNGVGD     | DLYSYGFDGL     | HLWTGHVARP     | V - - TSPGQHL | LAPEDVVSCC      | LDLSVPSISF   | RINGCPVQGV       | FEAFNLGCLF      | 777  |
| sRyR1 | PHLRIGWANT      | TGYVPYPPGG      | EKWGGNGVGD     | DLYSYGFDGA     | YVWSGGRKTQ     | VNRTHAEFPY    | IRKGDVIGCA      | LDLTVPIINF   | MFNGVTVTGS       | FTNFLNLCMF      | 788  |
| rRyR1 | FPVVSFSAGV      | KYRFLGGRH       | GFKFLPPPG      | YAPCHEAVLP     | RERLRLEPIK     | EYRREGPRGP    | HLVGPSCRLS      | HTDFVCPVVD   | TVQIVLPPHL       | ERIREKLAEN      | 877  |
| sRyR1 | FPVISCSSKL      | SCRFLGGH        | GRLRYAAPEG     | YSLPVSLLP      | QQILSLPECF     | YFGNIAKRA -   | - LAGPPLVQD     | DTAFVPTVVD   | TLQIPLPSYV       | EQIRDKLAEN      | 886  |
| rRyR1 | IHELWALTRI      | EQGWYGPVR       | DDNKRHLHPL     | VNFHSLPEPE     | RNYNLQMSGE     | TLKTLLALGC    | HVGMADAKAE      | DNLKKTCLP -  | KTYMMSNGYK       | PAPLDLSHVR      | 976  |
| sRyR1 | IHEMWAMNKI      | EAGWYVGIQR      | DDLHLHPCFL     | VPFERLPPAE     | KRYDIQLAVQ     | TLKTLLALGY    | YISL - - DKPP   | ARIRNRYLPN   | EPPMGSNGYK       | PAPLDLSAVT      | 984  |
| rRyR1 | LTPAQTTLLD      | RLAENGHNWV      | ARDRVAQGW      | YSYAVQDIPAR    | RNRLVYPYRL     | LDEATKRSNR    | DSLCAQVRTL      | LGVGYNIEFP   | DQEP - SQV - - - | - ENQSRWRDV     | 1072 |
| sRyR1 | LTPKMDELVD      | QLAENTHNLW      | ARERIQQGW      | YGLNEDPDMH     | RSPHLVYPYK     | VDDAIKKNR     | DTASETVRTL      | LVYGNLDLFP   | TGEJHEALL        | EASKQQAQEF      | 1084 |
| rRyR1 | RIFRAEKSYT      | VQSGRWYFEF      | EAVTIGEMRV     | GWARPELRPD     | VELGADELAY     | VFNHGRQRW     | HLG - SEPFR     | PWQSGDVVGC   | MIDLTTENTII      | FTLNGEVLMS      | 1171 |
| sRyR1 | RTYRAEKNYA      | VSGSKWYFEF      | EILTAGPMRV     | GWAHADMAPG     | MMLGQDENSW     | AFDGYNSLKY    | HGGASDTFGL      | QLKVGDIYGC   | FLDVTBQITIS      | FSLNGELIMD      | 1184 |
| rRyR1 | DSGSETAFRE      | IEIGDGFLPV      | CSLPGQGVGH     | NLNGQDVSSL     | RFFAICGLQE     | GFEFFAINMQ    | RPVTTWFSKS      | LPQFEPYPPE   | - HPHYEVARM      | DGTVDTPPCL      | 1270 |
| sRyR1 | ALGETTFAD       | VQ - GDNFVA     | CTLGVGQKAR     | LTYGQDVNTL     | KYFTTCGLQE     | GYPEFCVNMK    | RDVTHWYTKD      | QPIFENTDEM   | IDTRIDVTRI       | PAGSDTPPCL      | 1283 |
| rRyR1 | RLAHTWGSQ       | NSLVEMFLFR      | LSLPVQFHQH     | FRCTA - - - -  | FIDEAEKARR     | WWEIKERQQI    | LMKEAVEAQM      | PAHIDQIMRS   | GAT - - - - -    | - - - - - PLA   | 1311 |
| sRyR1 | KISHINTFET      | EK - ANWEFLR    | LSLPVICHNE     | FIDEAEKARR     | WWEIKERQQI     | LMKEAVEAQM    | PAHIDQIMRS      | GFTMNDIKGL   | HYEDNQEEVP       | SSKVRQPSR       | 1382 |
| rRyR1 | PP - - - - -    | - - - - - GLQ   | PP - - - - - A | EDEARAAE - -   | - - - - - PDP  | DYENLRRSAG    | GWGEAEGGKE      | GTAKEGTPGG   | TPQP - - GVEA    | QPVRAE - - - N  | 1375 |
| sRyR1 | PPRKGSMTRG      | VSYQNNYLQ       | PGQVNGMHR      | TSEAEAMAKYE    | LGAQNLSPDD     | KKDKGRSFPF    | KFRFSKRGES      | SDRAKSRSKS   | TPDPFSDTEV       | SPEGRPRPN       | 1482 |
| rRyR1 | EKDATTENK       | K - - - - -     | RGFLFKAKKA     | AMMTQPPATP     | ALPR - - - - - | - LPHDVVPAD   | NRD - DPETI     | LNTTTYVYSV   | RVFAGQEPSC       | VWVGWVTPDY      | 1457 |
| sRyR1 | PQIKVSAQAN      | RYNGMNRAPS      | RTNLYGSQVG     | LNSNAQMATP     | TQDRKQMTS      | TLAQSTTETV    | GNEIFDAECL      | KLINEYFYGV   | RIFPGQDPTH       | VYIGWVTTQY      | 1582 |
| rRyR1 | HQHDMMFDSL      | KYRAVVTVMG      | DEQGNVHSSL     | KCSNICYMVWG    | GDF - - - VSPG | QQGRISHTDL    | VIGCLVDLAT      | GLMTFTTANGK  | ESNTFFQVEP       | NTKLFFAVFV      | 1554 |
| sRyR1 | HLHSKDFVNS      | DDYDRVVEN       | NRQSCYMVRA     | DELYNEVMAE     | ATAKQASQGM     | FIGCSYDST     | GTYSFTCEGK      | DTFSFKKMEP   | ETKLFFAIFV       | 1682            |      |
| rRyR1 | LPTHQNVIOF      | ELGKQKNIMP      | LSAAMFLSER     | KNPAPQCPRP     | LEVOMLMPVS     | WSRMPNHFLQ    | VETRAGERL       | GWAVQCQDPL   | TMALHIPEE        | NRCMDILELS      | 1654 |
| sRyR1 | EATSKELIQI      | ELGRSTSLP       | LSAAVLPTSD     | KHYIPIQFPP     | LKYQCLKPHQ     | WARVPNQSLL    | VHALKLSDIR      | GWSMLCEDAV   | SMALHIPEE        | DRCIDILELI      | 1782 |
| rRyR1 | ERLDLQRFHS      | HTLRLYRVC       | ALGNRRVAHA     | LCSHVDQAQL     | LHALEDAHLP     | GPLRAGYDDL    | LISIHLESAC      | RSRRSMLSEY   | IVPLTPETRA       | ITLFFPPGRKG     | 1754 |
| sRyR1 | EMDKLLSFHS      | HTLTLYAALC      | YQSNRYRAHA     | LCTHYDQKQL     | LYAIQSQYMS     | GPLRQGFYDL    | LIALHLESAC      | TTMEACKNEF   | VIPGLPELKA       | LYEDPD - - -    | 1878 |
| rRyR1 | GNARRHGLPG      | VGVTSLRRP       | HHFSPPCFVA     | ALPAAGVAEA     | PARLSPAIPL     | EALRDKALRM    | LGEAVRDGGQ      | HARDPPVGSVS  | EFQFVYVPLKL      | VSTLLVMGIF      | 1854 |
| sRyR1 | - - - MGHSLSR   | LQ - TESVRPQ    | MKMTDI - - -   | - - - AESITDI  | SNLYSPYFPL     | EYVREFVMAQ    | LAEAVETNQV      | HNRPVVGGSN   | ENLFLPLIKL       | VDRLLLVGMM      | 1967 |
| rRyR1 | GDEDVQKILK      | MIPEVFTEE       | EEEEEEEEEE     | EEEEEEEEEE     | KEEDEEEEEK     | EDAEEEEEEA    | PEGEKEDLEE      | GLLQMKLPES   | VKLQMCNLE        | YFCDQELQHR      | 1954 |
| sRyR1 | RLHEDVKKLI      | MTNPETW -       | - - - - - DPS  | - - - - - DPS  | FDKEGKDEHR     | K - - - - -   | - - - - -       | GLLHMKMAEG   | AKLQMCYLLQ       | HLNDILQRH       | 2028 |
| rRyR1 | VESLAFAER       | YVDKLANQR       | SRVALLMRAF     | TMSAAETARR     | TREFRSPQPE     | QINMLLHFK -   | - DEADEEDCP     | LPEDIRQDLQ   | DFHQDLLAHC       | GIQL - - - - EG | 2048 |
| sRyR1 | VEAIIAFAHD      | FVGDQLQDQL      | RRYTEIKQS -    | DLPSAVAACK     | TREFRCPPRE     | QMNAILSFKH    | LEEDKENCPC      | CGEELIARMN   | EFHESLMAHV       | SLNALQEPDG      | 2127 |
| rRyR1 | EE - - - - -    | - - - - -       | - - - EEPET    | SLSSRLRSL      | ETVRLVKKKE     | EKPEEELPAE    | EKKPQSLQEL      | VSHMVVRWAQ   | EDYVQSPELV       | RAMFSLLRHQ      | 2127 |
| sRyR1 | TENQPEAKP       | GAFGKLYNII      | NTYKELEEE      | - - - - -      | - - - - - KAI  | DEPPKKT - E   | EK - - - - FRKV | LIQTIYNWAE   | ESQIETPKLV       | REMFSLLYRQ      | 2205 |
| rRyR1 | YDGLGELLRA      | LPRAYTISPS      | SVEDTMSLLE     | CLGQIRSLLI     | VQMGPQEEEN     | MIQSIGNIMN    | NKVFYQHPNL      | MRALGMHETV   | MEVMNVVLG -      | - - - - -       | 2216 |
| sRyR1 | YDAVAGELIRA     | LEKTYVINAK      | TKLDVAEMWV     | GLSQIRALLP     | VQMSQEEEL      | MRKRLWKLVN    | NHTFFQHPDL      | IRVLRVHENV   | MAYMNTLGR        | RAQAQSDAQP      | 2305 |
| rRyR1 | - - - - - GGETK | EIRFP - KMVT    | SCCRFLCYFC     | RISRQNRQSM     | FDHLSYLLN      | SGIGLG - - M  | QGSTPLDVAA      | ASVIDNNELA   | LALQEODLEK       | VVSYLAGCGL      | 2307 |
| sRyR1 | ASPPVAEDSK      | EKDTISEHMY      | ACCRFLCYFC     | RTGRQNRQAM     | FDHFDLLEN      | SNILSRPSL     | RGSTPLDVAY      | SLMENTELA    | LALREHYLEK       | IAYVLSRGLI      | 2405 |
| rRyR1 | QSCPMLLAKG      | YPDIGWNPFC      | GERYLDLFLR     | AVFVNGESVE     | ENANVVVRL      | IRKPECFCGPA   | LRGEGGSGLL      | AAIEEAIRIS   | EDPARDGPGV       | RRDRRREHFG      | 2407 |
| sRyR1 | QSNSELVEKG      | YPDLGWDPE       | GERYLDLFLR     | CVWVNGESVE     | ENANVIRLL      | IRRPECLGPA    | LRGEG - EGLL    | KAIVDANKMS   | ERIAADR - - -    | RKLREMEQEG      | 2500 |
| rRyR1 | - - - - - E     | EPPEENRVHL      | GHAIMSFYAA     | LIDLLGRCAP     | EMHLIQAGK      | EALRIRAILR    | SLVPLDDBIVG     | LIISL - PLQI | PTLGKDGALV       | QPK - MSASF     | 2494 |
| sRyR1 | DVNFSHPLPE      | SDEDEDYIDT      | GAILLFYCT      | LVDLLGRCAP     | DAGVIALGKN     | ESLRARAILR    | SLVPLEDLOG      | VLSLRFITLN   | PAAGEE - - -     | RPKSDMPSGL      | 2596 |
| rRyR1 | VPDHKASMYL      | FLDRVYGIEN      | QDFLLHVLVD     | GFLPDMRAAA     | SLDTATFSTT     | EMALALNRYL    | CLAVLPLITK      | CAPLFAGTEH   | RAIMVDSMLH       | TVYRLSRGRS      | 2594 |
| sRyR1 | IPGHKQSVGL      | FLERVYGIET      | QELFYKLLKE     | AFLPDLRAAT     | MLDRNDGCE      | SMALSNRYI     | GNSILPLLIK      | HAYFYNEAEN   | YASLLDATLH       | TVYRLSKNRM      | 2696 |
| rRyR1 | LTKAQRDVIE      | DCLMALCRYI      | RPSMLQHLR      | RLVFDVPIIN     | EFAKMPKLK      | TNHYERCWKY    | Y - CLPTGWAN    | FGVTSEELH    | LTRKLFWGIF       | DSLAKHKYDQ      | 2693 |
| sRyR1 | LTKGQREAVS      | DFLVALTSA       | QPSMLKLRL      | KLVYDVSLS      | EYTTVALRL      | TLHYERCARK    | YGSTGAGQGV      | YGASSDEEK    | LTMLFSNIF        | DSLKSMDEYEP     | 2796 |
| rRyR1 | ELYRMAMPCL      | CAIAGALPPD      | Y - - - - VDAS | YSSKAIEKAT     | VDAEGNFDPR     | PVETLNVIIIP   | EKLDSFINKF      | AEYTHEKWAF   | DKIQNNWSYG       | ENVDEELKTH      | 2788 |
| sRyR1 | ELFGKALPCL      | IAIGCALPPD      | YLSKSNYDDE     | FYKGEQVAGD     | LD - NPQYDPP   | PIINTSSVALN   | NDLNTIVQKF      | SEHYHDWAS    | RKLENGWYVG       | EGWSDSQKTH      | 2895 |

|       |       |
|-------|-------|
| NTD-A | 59.7% |
| NTD-B | 47.1% |
| NTD-C | 51.5% |
| SPRY1 | 52.2% |
| RY1&2 | 53.4% |
| SPRY1 | 46.6% |
| SPRY2 | 29.0% |
| JSol  | 35.7% |
| BSol  | 48.5% |

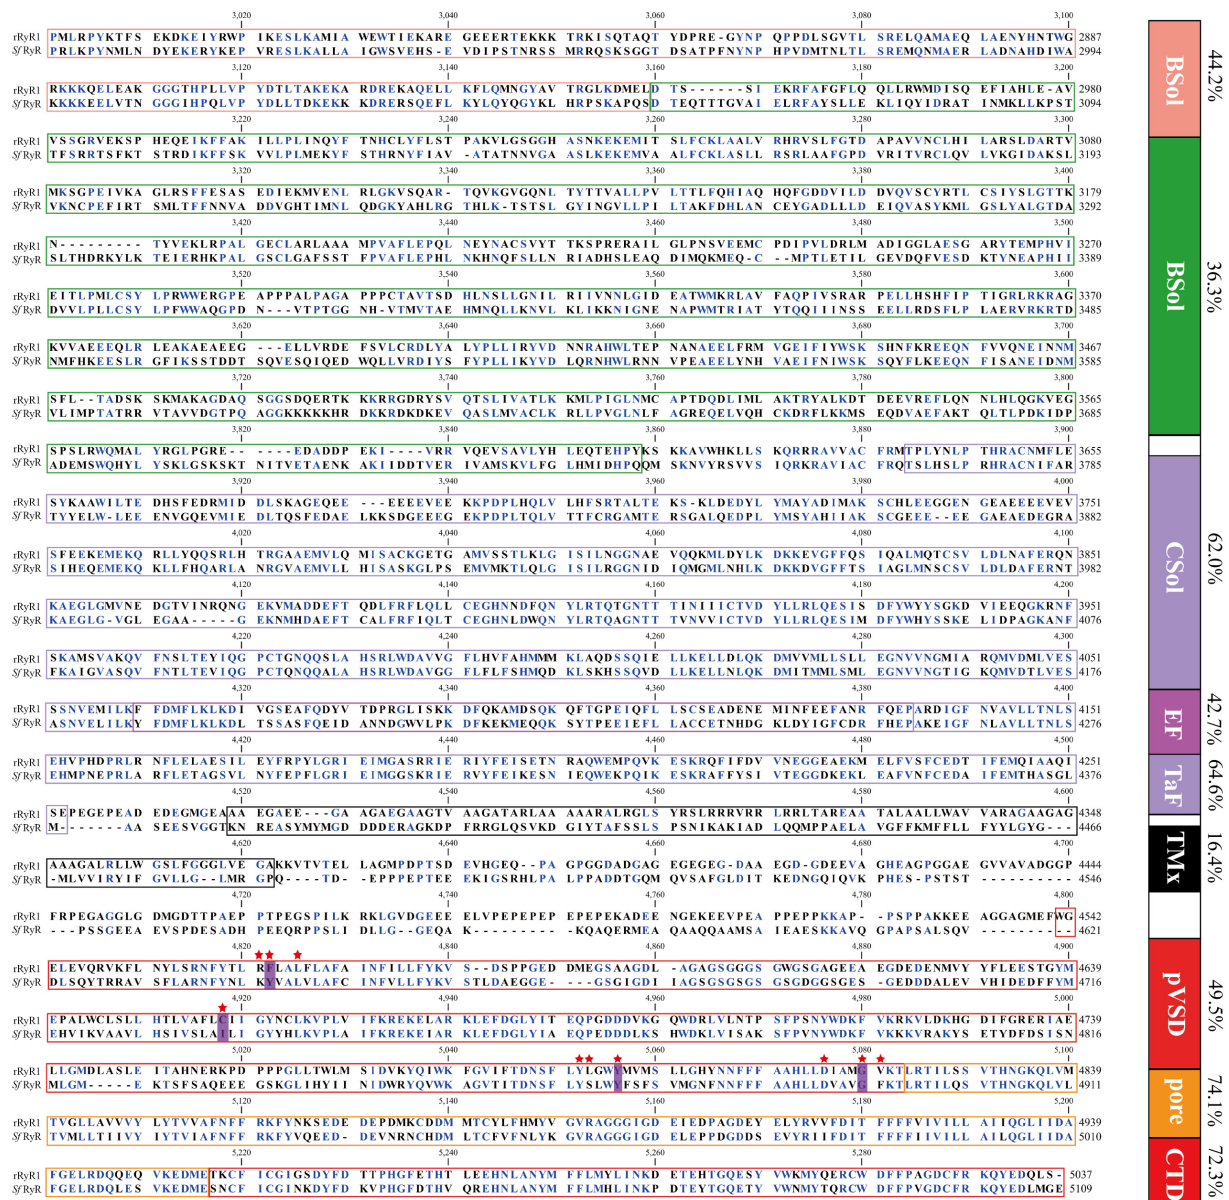

**Supplementary Figure 1. Sequence alignment between rRyR1 and Sf RyR.** Different domains are outlined in boxes of various colors, and the sequence identities of these domains are displayed on the right side. Amino acids that interact with diamides are marked with asterisks, while the resistance mutation sites are highlighted in purple.

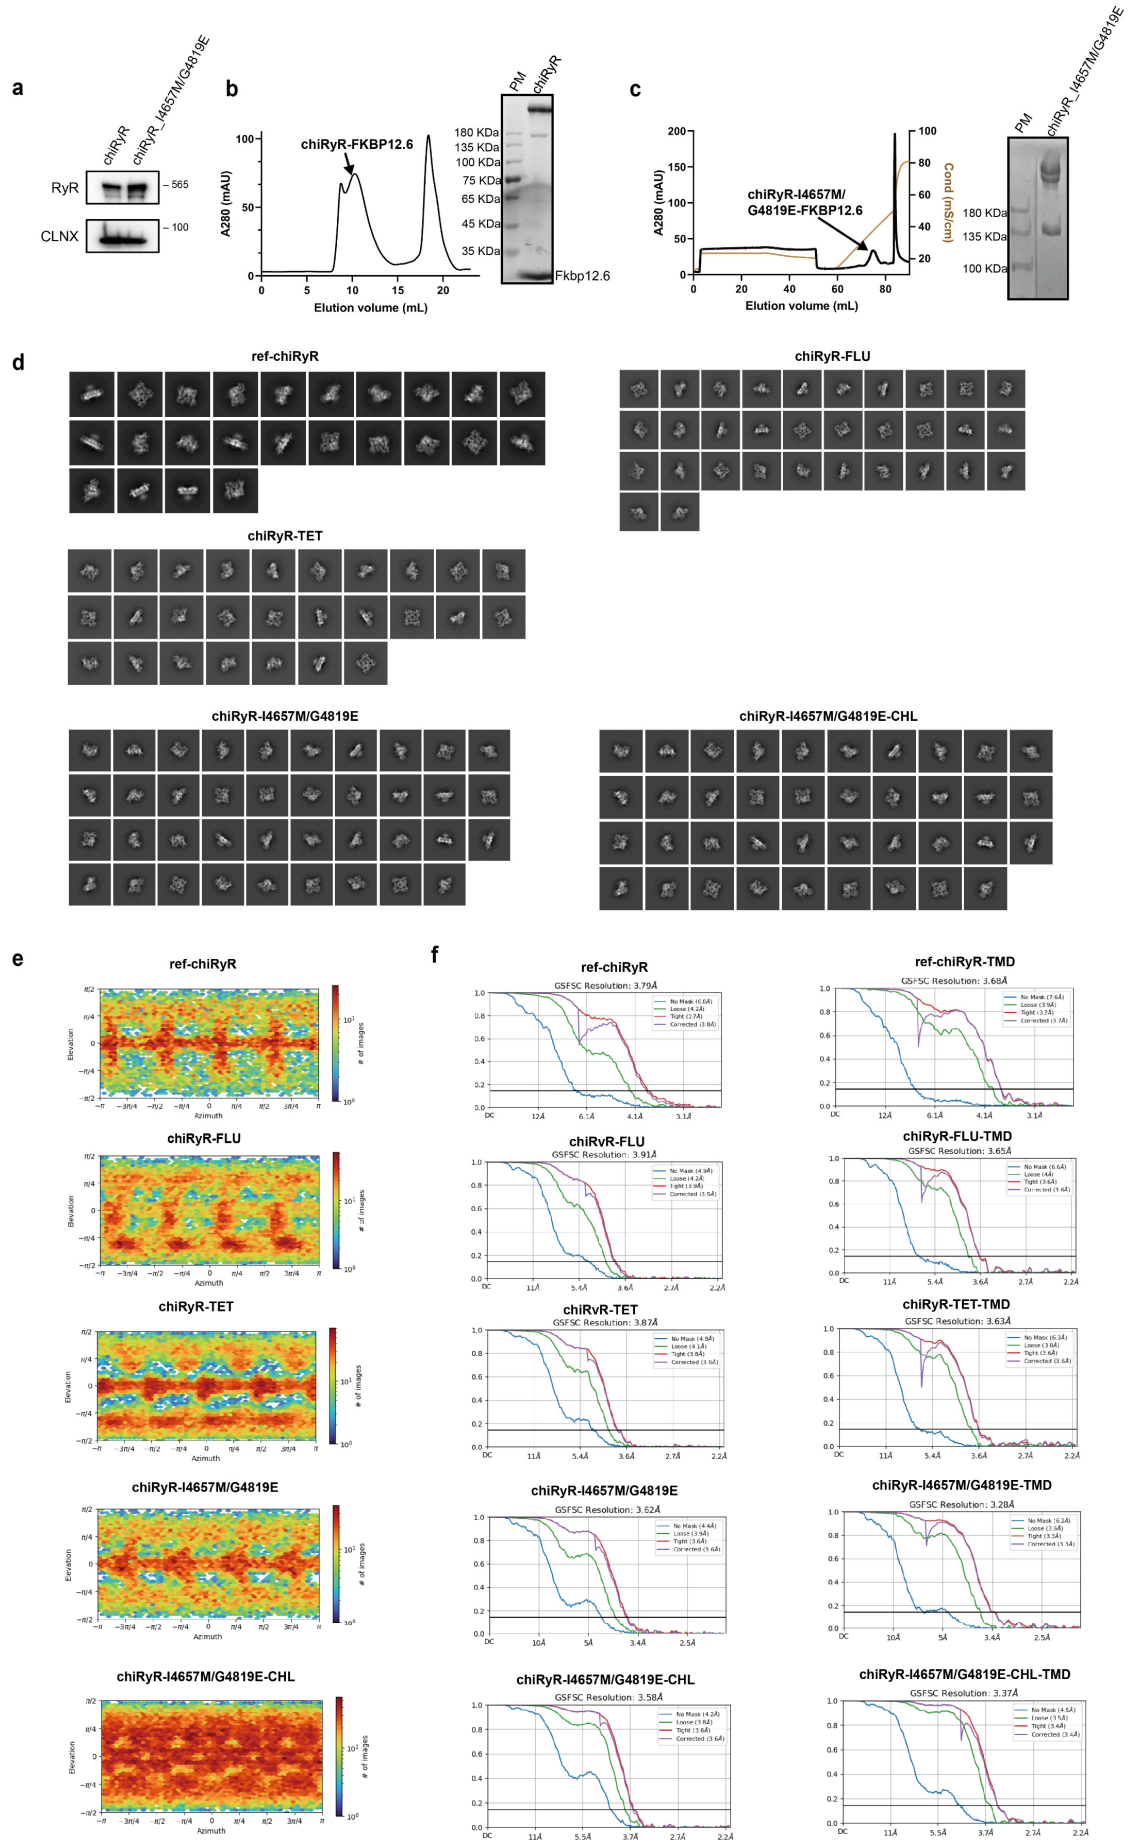



**Supplementary Figure 2. Purification and cryo-EM analysis of chiRyRs.** **a** Western blot showing the expression of chiRyR and chiRyR-I4657M/G4819E in HEK293 cells. CLNX protein was used as the internal control. Source data are provided as a Source Data file. **b** Purification of chiRyR. The elution profile of chiRyR by gel-filtration chromatography using a Superose 6 Increase column is shown in the left panel, and SDS-PAGE showing purified chiRyR is in the right panel. Source data are provided as a Source Data file. **c** Purification of chiRyR- I4657M/G4819E. The elution profile of chiRyR-I4657M/G4819E by anion exchange chromatography using a HiRes Q 5/50 column is shown in the left panel, and SDS-PAGE showing purified chiRyR-I4657M/G4819E is in the right panel. **d** Representative two-dimensional class averages for ref-chiRyR, chiRyR-FLU, chiRyR-TET, chiRyR-I4657M/G4819E, and chiRyR-I4657M/G4819E-CHL. **e** The orientation distributions of the particles used for the final reconstructions. **f** Summary of the Fourier shell correlation (FSC) curves generated by CryoSPARC for global refinement (left) and TMD local refinement (right).



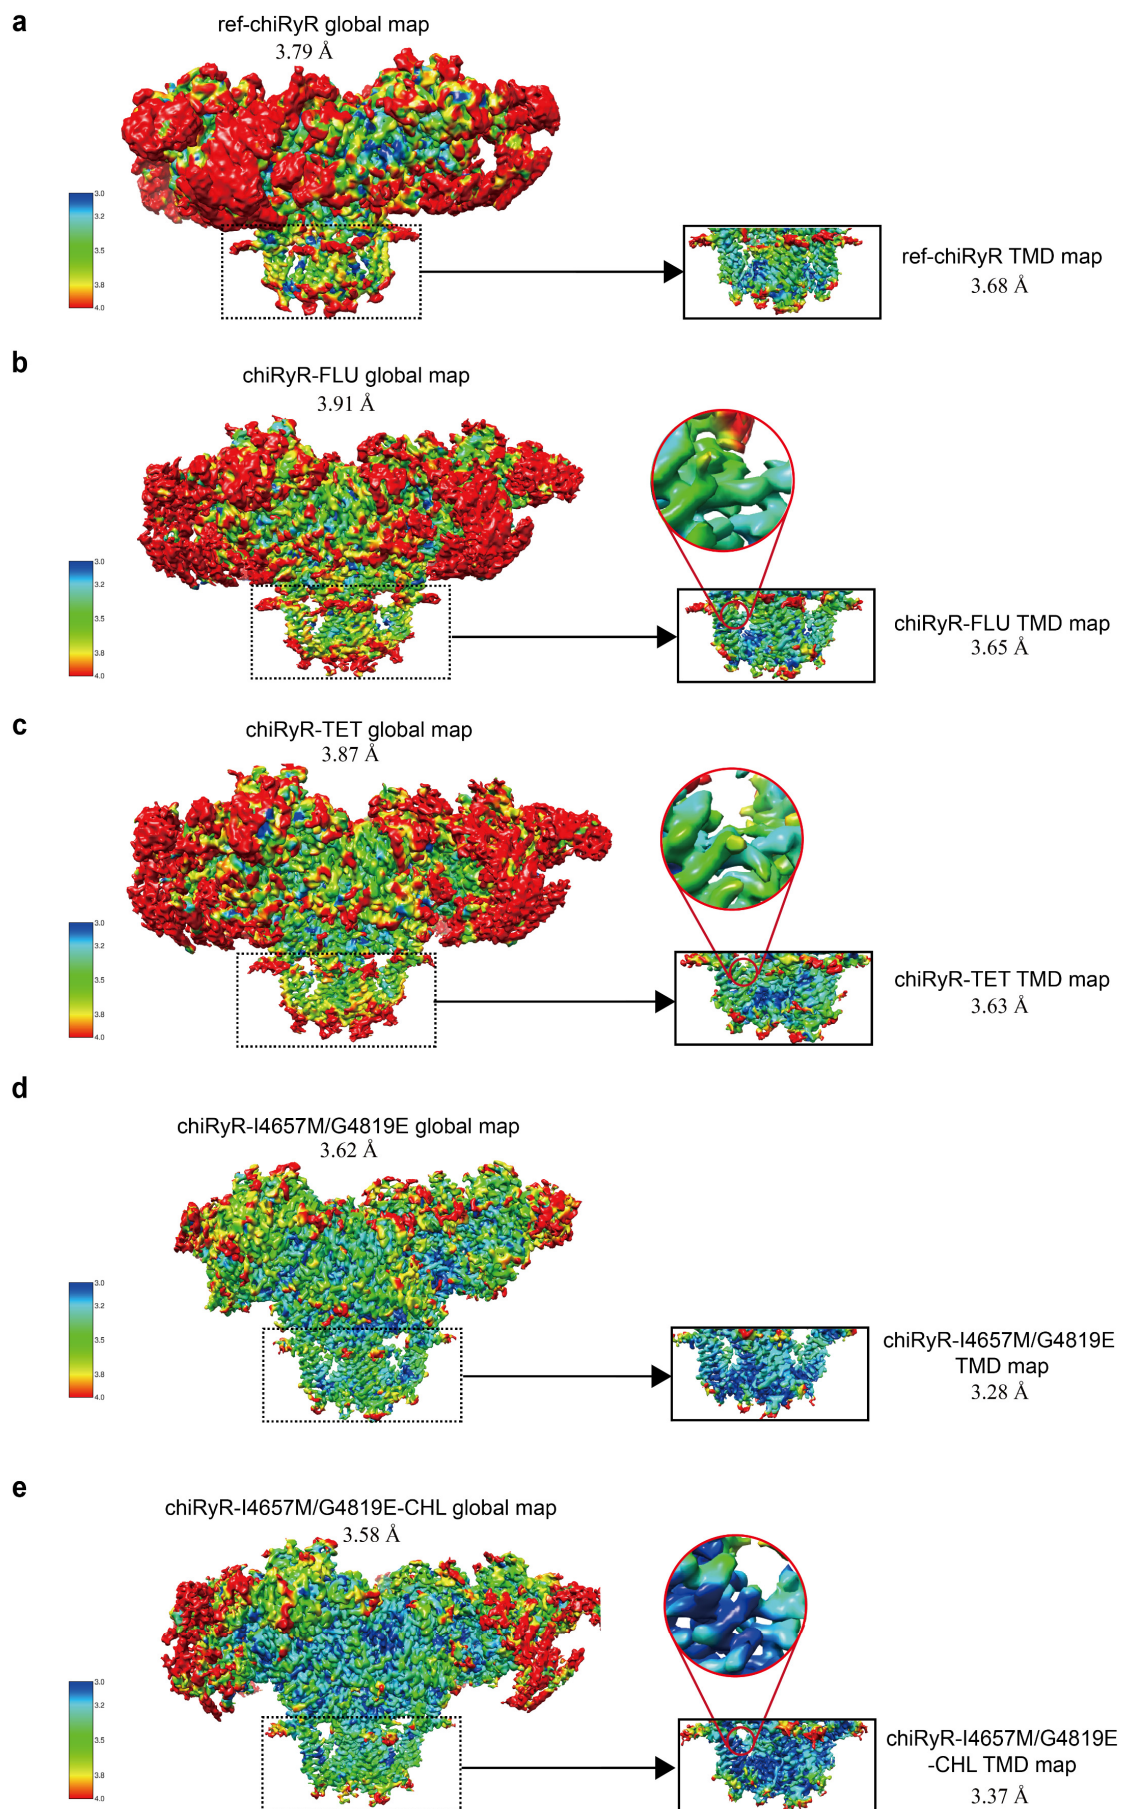

**Supplementary Figure 3. Local resolution estimates.** Local resolution estimation is shown by colored global and locally refined maps for ref-chiRyR (a), chiRyR-FLU (b), chiRyR-TET (c), chiRyR-I4657M/G4819E (d), and chiRyR-I4657M/G4819E-CHL (e). The color bar indicates resolution in angstroms (Å). The ligands in chiRyR-FLU, chiRyR-TET, and chiRyR-I4657M/G4819E-CHL are shown in zoomed-in insets.

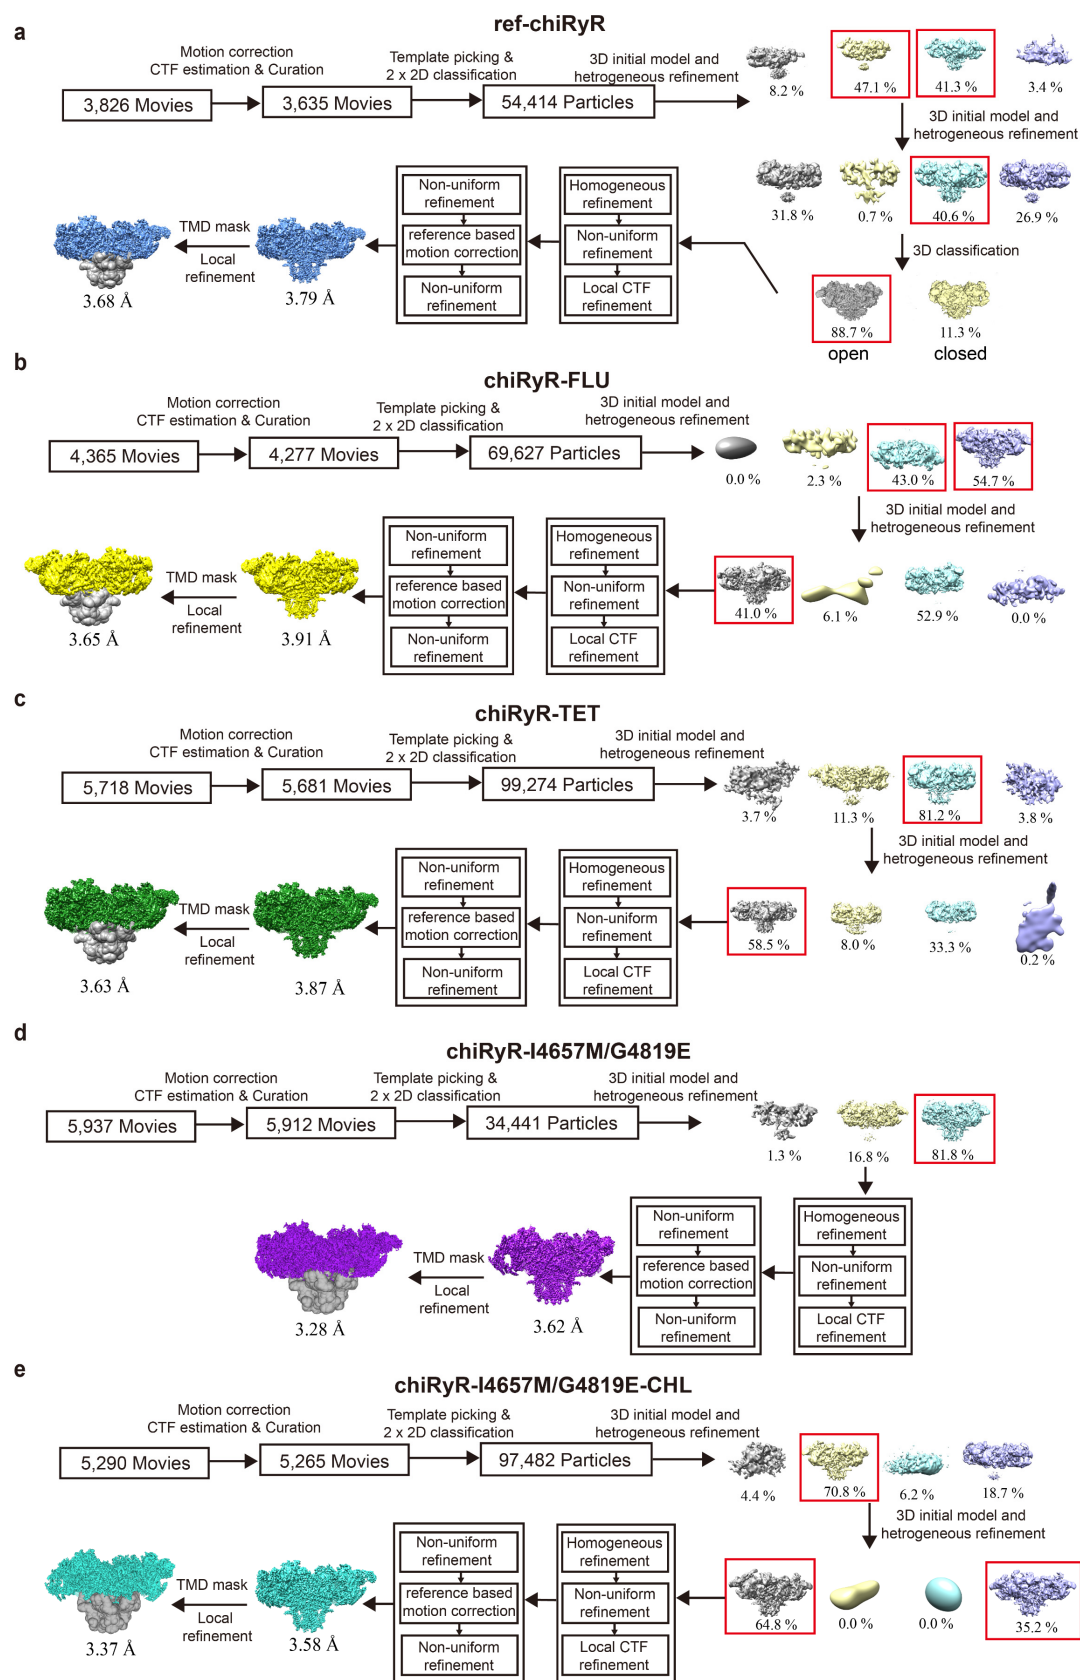

**Supplementary Figure 4. Cryo-EM processing pipeline.** Cryo-EM data collection, 3D classification, and refinement schemes for ref-chiRyR (a), chiRyR-FLU (b), chiRyR-TET (c), chiRyR-I4657M/G4819E (d), and chiRyR-I4657M/G4819E-CHL (e).



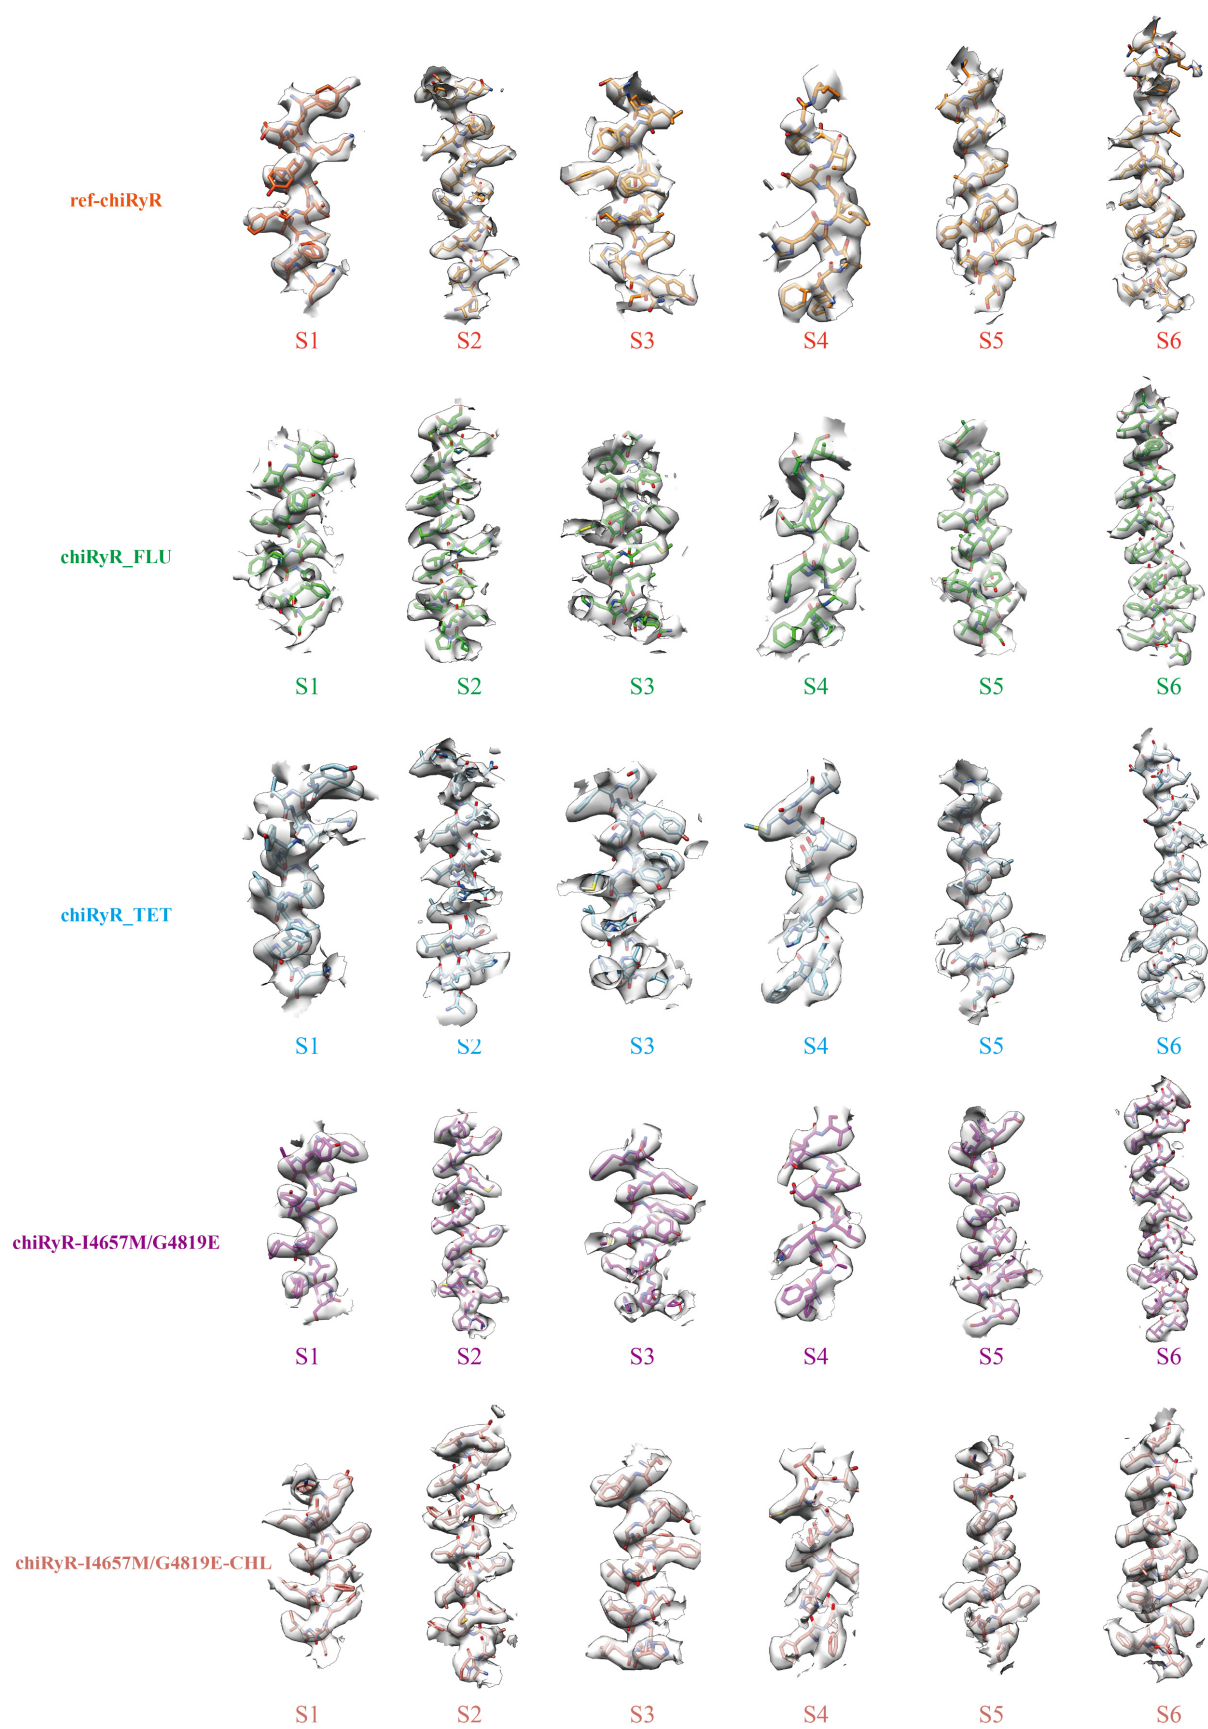

**Supplementary Figure 5. The density of the S1-S6 helices from different chiRyRs.**

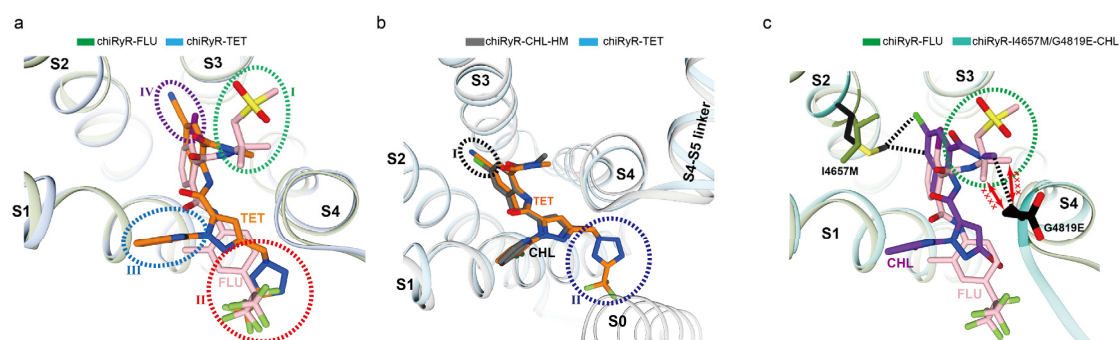

**Supplementary Figure 6. Comparison of the diamide binding poses.** **a** The comparison of the diamide binding poses between chiRyR-FLU and chiRyR-TET reveals four major differences. **b** The comparison of the diamide binding poses between chiRyR-CHL (chiRyR-CH-HM: a homology model based on rRyR1-CHL (PDB ID: 6M2W)) and chiRyR-TET reveals two major differences. **c** The comparison of the diamide binding poses between chiRyR-FLU and chiRyR-I4657M/G4819E-CHL shows that FLU would have clash with the Glu4819.

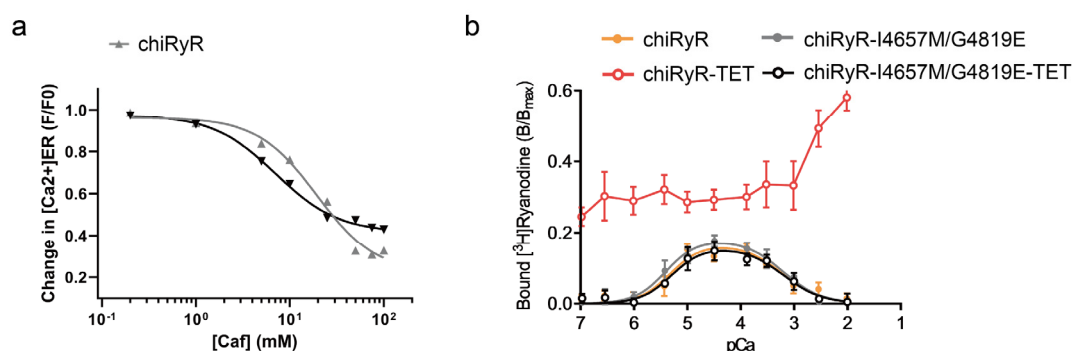

**Supplementary Figure 7. Functional characterization of chiRyR and chiRyR-I4657M/G4819E.** **a** The dose-dependent curves of caffeine show that the resistance mutations does not significantly change the caffeine sensitivity of chiRyR. The EC<sub>50</sub> values for chiRyR and chiRyR-I4657M/G4819E are 19.5 mM and 7.1 mM, respectively (Supplementary Table 4). Source data are provided as a Source Data file. **b** Ca<sup>2+</sup>-dependent [<sup>3</sup>H]ryanodine binding of chiRyR and chiRyR-I4657M/G4819E in the absence or presence of TET. The biphasic Ca<sup>2+</sup>-dependency of chiRyR-I4657M/G4819E shows no significant difference compared to that of chiRyR, with EC<sub>50</sub> values for Ca<sup>2+</sup> 5.0 ± 1.1 μM (chiRyR) and 4.4 ± 2.4 μM (chiRyR-I4657M/G4819E) and IC<sub>50</sub> values for Ca<sup>2+</sup> are 0.67 ± 0.37 mM (chiRyR) and 0.59 ± 0.19 mM (chiRyR-I4657M/G4819E) (mean ± SD, n=4). 1 μM TET can promote [<sup>3</sup>H]ryanodine binding in chiRyR but not in chiRyR-I4657M/G4819E. Source data are provided as a Source Data file.

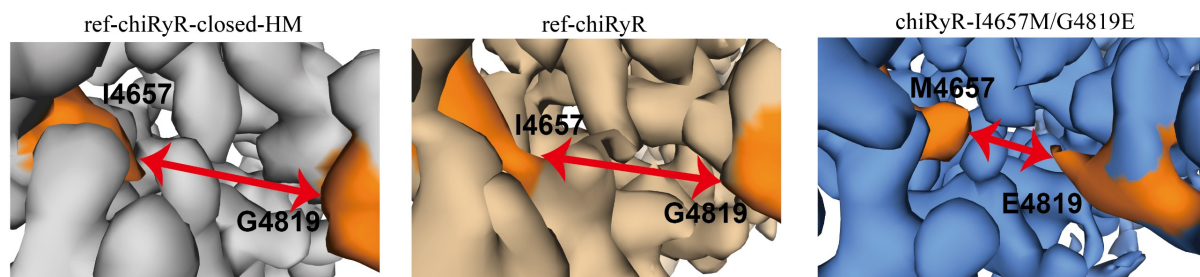

**Supplementary Figure 8. Comparison of the diamide binding pockets between wild-type and resistant RyRs.** Comparison of the density maps of the diamide-binding pocket between the closed-state ref-chiRyR (ref-chiRyR-closed-HM: a homology model based on closed rRyR1(PDB ID: 5TAQ), ref-chiRyR and chiRyR-I4657M/G4819E-CHL. The density map of ref-chiRyR-closed-HM was generated by the molmap module in UCSF Chimera. The density maps are shown at the  $5\sigma$  level. The two resistance mutation sites are colored in orange, and the distances between them are indicated by red arrows.



**Supplementary Table 1. EC<sub>50</sub> values of diamide insecticides measured by time-lapse fluorescence assay using stable cell lines expressing RyRs from different species**

| Diamide | RyR variants  | EC <sub>50</sub> <sup>a</sup> | 95% CI              | R <sup>2</sup> |
|---------|---------------|-------------------------------|---------------------|----------------|
| FLU     | rRyR1         | 4.5 µM                        | 2.2 µM– 14.0 µM     | 0.874          |
|         | <i>Sf</i> RyR | 59.3 nM                       | 45.6 nM – 76.2 nM   | 0.984          |
|         | chiRyR        | 25.1 nM                       | 20.7 nM – 30.6 nM   | 0.996          |
| TET     | rRyR1         | 7.6 µM                        | 5.8 µM – 10.0 µM    | 0.978          |
|         | <i>Sf</i> RyR | 174.5 nM                      | 130.2 nM - 224.7 nM | 0.979          |
|         | chiRyR        | 46.1 nM                       | 35.4 nM – 62.8 nM   | 0.935          |

a: n = 3.

**Supplementary Table 2. EC<sub>50</sub> values of diamide insecticides measured by time-lapse fluorescence assay using stable cell lines expressing different rRyR1 mutants**

| Diamide | RyR variants | EC <sub>50</sub> <sup>a</sup> | 95% CI              | R <sup>2</sup> |
|---------|--------------|-------------------------------|---------------------|----------------|
| FLU     | rRyR1        | 4.5 µM                        | 2.2 µM– 14.0 µM     | 0.874          |
|         | rRyR1 R4563K | 3.9 µM                        | 3.5 µM – 4.3 µM     | 0.995          |
|         | rRyR1 F4564Y | 26.1 µM                       | 21.6 µM – 33.4 µM   | 0.985          |
|         | rRyR1 C4657I | 8.9 µM                        | 8.2 µM – 9.6 µM     | 0.995          |
|         | rRyR1 L4792S | 208.9 nM                      | 172.7 nM – 250.4 nM | 0.976          |
| CHL     | rRyR1        | 4.9 µM                        | 4.5 µM – 5.4 µM     | 0.996          |
|         | rRyR1 R4563K | 62.6 nM                       | 52.8 nM – 74.0 nM   | 0.985          |
|         | rRyR1 F4564Y | 555.7 nM                      | 478.9 nM – 645.0 nM | 0.993          |
|         | rRyR1 C4657I | 167.3 nM                      | 153.2 nM – 183.0 nM | 0.994          |
|         | rRyR1 L4792S | 44.8 nM                       | 42.7 nM – 47.2 nM   | 0.994          |

a: n = 3.

**Supplementary Table 3. Cryo-EM data collection, refinement and validation statistics**

| Protein                                             | chiRyR                            |               |               | chiRyR-I4657M/G4819E |               |
|-----------------------------------------------------|-----------------------------------|---------------|---------------|----------------------|---------------|
| Condition                                           | 5 mM caffeine                     | 5 mM caffeine | 5 mM caffeine | 5 mM caffeine        | 5 mM caffeine |
|                                                     | 2 mM ATP                          | 2 mM ATP      | 2 mM ATP      | 2 mM ATP             | 2 mM ATP      |
|                                                     | 100 μM                            | 100 μM        | 100 μM        | 100 μM               | 100 μM        |
|                                                     | CaM1234                           | CaM1234       | CaM1234       | CaM1234              | CaM1234       |
|                                                     |                                   | 50 μM FLU in  | 50 μM TET in  |                      | 625 μM CHL    |
| PDB ID                                              | 2% DMSO                           | 2% DMSO       | 2% DMSO       | 2% DMSO              | in 5% DMSO    |
|                                                     | 8XLF                              | 8XJI          | 8XKH          | 8XLH                 | 8Y40          |
| EMDB ID                                             | EMD-38447,                        | EMD-38398,    | EMD-38417,    | EMD-38448,           | EMD-38446,    |
|                                                     | EMD-60900                         | EMD-38551     | EMD-38553     | EMD-60899            | EMD- 60901    |
|                                                     | for TMD                           | for TMD       | for TMD       | for TMD              | for TMD       |
| Data collection and processing                      |                                   |               |               |                      |               |
| Microscope                                          | FEI Titan Krios                   |               |               |                      |               |
| Detector                                            | Gatan K3 direct electron detector |               |               |                      |               |
| Magnification                                       | ×22,500                           |               |               |                      |               |
| Volotage (kV)                                       | 300                               |               |               |                      |               |
| Electron exposure (e <sup>-</sup> /Å <sup>2</sup> ) | 50                                |               |               |                      |               |
| Defocus range (μm)                                  | 1.0-2.4                           |               |               |                      |               |
| Pixel size (Å)                                      | 1.06                              |               |               |                      |               |
| Initial particle images                             | 54,414                            | 69,627        | 99,274        | 34,441               | 97,482        |
| Final particle images                               | 19,505                            | 27,906        | 47,206        | 28,189               | 69,016        |
| Map resolution (Å)                                  | 3.79                              | 3.91          | 3.87          | 3.62                 | 3.58          |
| FSC threshold                                       | 0.143                             |               |               |                      |               |
| Model building and refinement                       |                                   |               |               |                      |               |
| Model composition                                   |                                   |               |               |                      |               |
| Protein atoms                                       | 119,048                           | 119,880       | 119,330       | 124,576              | 123,204       |
| Ligands                                             | 16                                | 20            | 20            | 16                   | 20            |
| R.M.S. deviations                                   |                                   |               |               |                      |               |
| Bond length (Å)                                     | 0.008                             | 0.007         | 0.007         | 0.009                | 0             |
| Bond angles (°)                                     | 0.974                             | 0.904         | 0.882         | 1.045                | 1.169         |
| Validation                                          |                                   |               |               |                      |               |
| MolProbity score                                    | 2.22                              | 2.02          | 2.37          | 2.58                 | 2.41          |
| Clashscore                                          | 6.03                              | 9.28          | 10.21         | 11.15                | 11.26         |
| Rotamer outliers (%)                                | 0.62                              | 0.98          | 1.13          | 1.28                 | 1.96          |
| Ramachandran plot                                   |                                   |               |               |                      |               |
| Favored (%)                                         | 89.86                             | 94.13         | 92.36         | 84.61                | 87.19         |
| Allowed (%)                                         | 9.90                              | 5.51          | 6.65          | 14.26                | 11.78         |
| Outlier (%)                                         | 0.62                              | 0.35          | 1.00          | 1.24                 | 1.02          |

**Supplementary Table 4. EC<sub>50</sub> values of diamide insecticides and caffeine measured by time-lapse fluorescence assay using stable cell lines expressing wild-type or resistant RyRs**

| Diamide          | RyR variants         | EC <sub>50</sub> <sup>a</sup> | 95% CI            | R <sup>2</sup> |
|------------------|----------------------|-------------------------------|-------------------|----------------|
| FLU <sup>b</sup> | chiRyR               | 25.1 nM                       | 20.1 nM – 30.6 nM | 0.996          |
|                  | chiRyR-I4657M/G4819E | > 300 µM                      | -                 | -              |
|                  | SfRyR                | 59.3 nM                       | 45.6 nM – 76.2 nM | 0.984          |
|                  | SfRyR_I4734M/G4891E  | > 300 µM                      | -                 | -              |
| CHL              | chiRyR               | 1.6 nM                        | 1.2 nM – 2.1nM    | 0.965          |
|                  | chiRyR-I4657M/G4819E | 14.6 µM                       | 10.1 µM – 21.2 µM | 0.893          |
|                  | SfRyR                | 5.5 nM                        | 5.3 nM – 5.7 nM   | 0.998          |
|                  | SfRyR_I4734M/G4891E  | 9.1 µM                        | 7.1 µM – 11.5 µM  | 0.982          |
| Caffeine         | chiRyR               | 19.5 mM                       | 14.3 mM – 35.7 mM | 0.983          |
|                  | chiRyR-I4657M/G4819E | 7.1 mM                        | 4.6 mM – 11.7 mM  | 0.970          |

a: n = 3; b: Due to the solubility limit, the highest tested concentration of FLU was 300 µM.

**Supplementary Table 5. EC<sub>50</sub> values of diamide insecticides measured by [<sup>3</sup>H]Ryanodine binding assay**

|     | chiRyR <sup>a</sup> | chiRyR-I4657M/G4819E <sup>a</sup> |
|-----|---------------------|-----------------------------------|
| CHL | 1.7 ± 0.3 nM        | 14.7 ± 1.6 µM                     |
| TET | 11.1 ± 0.9 nM       | 87.8 ± 6.4 µM                     |
| FLU | 4.0 ± 1.4 nM        | -                                 |

a: n = 4.

**Supplementary Table 6. The LD<sub>50</sub> values of two diamide insecticides in different Cas9 *Drosophila melanogaster***

| Diamide | <i>Drosophila</i> | LD <sub>50</sub> <sup>a</sup> | 95% CI              | R <sup>2</sup> |
|---------|-------------------|-------------------------------|---------------------|----------------|
| FLU*    | M4758I            | 10.4 µM                       | 8.4 µM - 12.8 µM    | 0.973          |
|         | G4915E            | AA.                           | -                   | -              |
| CHL     | M4758I            | 127.9 nM                      | 107.8 nM – 152.8 nM | 0.977          |
|         | G4915E            | 1.6 mM                        | 460.1 µm – 30.2 mM  | 0.711          |

a: n = 30; AA.: All alive.



**Supplementary Table 7. Primers for rRyR1 and *Sf* RyR mutations**

| Name                   | Sequence (5'→ 3')            |
|------------------------|------------------------------|
| rRyR1-R4563K-F         | CTACACCCTGAAGTTCCTTGCC       |
| rRyR1-R4563K-R         | GGCAAGGAACTTCAGGGTGTAG       |
| rRyR1-F4564Y-F         | CACCCTGCGCTACCTTGCCCTCTTC    |
| rRyR1-F4564Y-R         | GAAGAGGGCAAGGTAGCGCAGGGTG    |
| rRyR1-C4657I-F         | GCCTTCCTCATCATCATCGG         |
| rRyR1-C4657I-R         | CCGATGATGATGAGGAAGGC         |
| rRyR1-L4792S-F         | G TTCCTGTACAGCGGCTGGTAC      |
| rRyR1-L4792S-R         | GTACCAGCCGCTGTACAGGAAC       |
| rRyR1-I4657M-F         | GTGGCCTTCCTCATGATCATCGGCTAC  |
| rRyR1-I4657M-R         | G TAGCCGATGATCATGAGGAAGGCCAC |
| rRyR1-G4819E-F         | CATCGCCATGGAGGTCAAGACGCTG    |
| rRyR1-G4819E-R         | CAGCGTCTTGACCTCCATGGCGATG    |
| <i>Sf</i> RyR-I4734M-F | GTGTCGCTCGCTATGCTCATCGGGT    |
| <i>Sf</i> RyR-I4734M-R | ACCCGATGAGCATAGCGAGCGACAC    |
| <i>Sf</i> RyR-G4891E-F | AGATGTCGCTGTCGAGTTCAAGACC    |
| <i>Sf</i> RyR-G4891E-R | GGTCTTGA ACTCGACAGCGACATCT   |

For Source Data

Supplementary Figure 2a uncropped blot

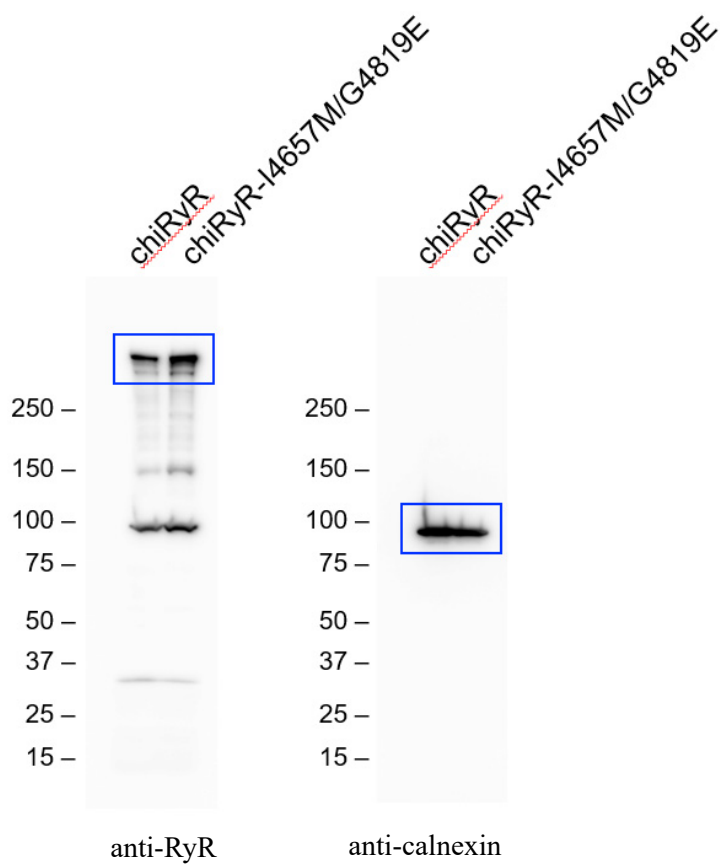

## For Source Data

Supplementary Figure 2a uncropped gel

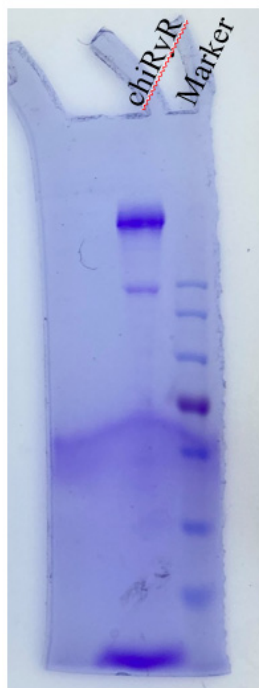

Supplementary Figure 2c uncropped gel

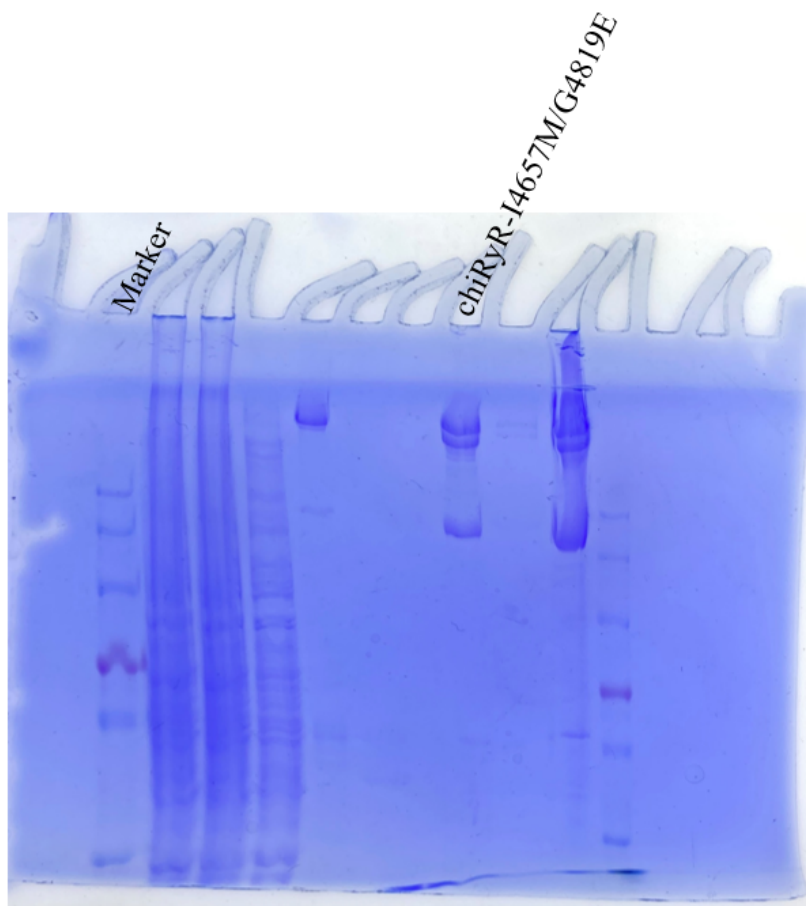

Supplement: MOESM1 [file 41467_2024_53490_MOESM1_ESM.pdf]
